SPRING 2018 | VOLUME 30 | NUMBER 2

The Journal of  
**Neuropsychiatry**  
and Clinical Neurosciences

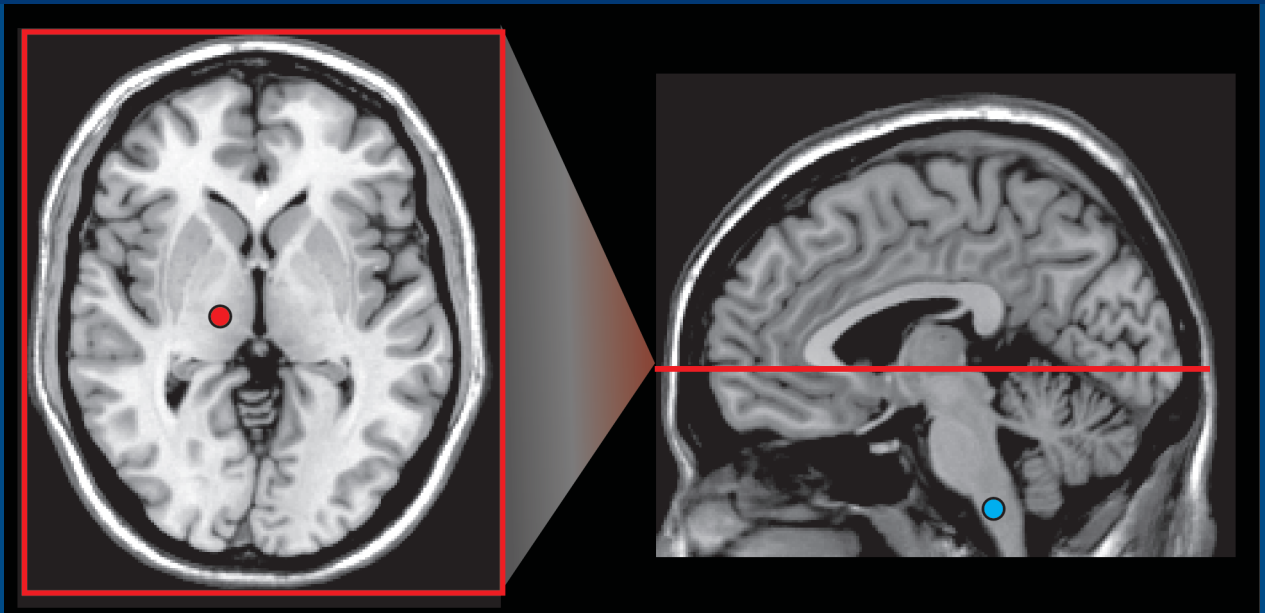

Traumatic Brain Injury and Posttraumatic Stress Disorder: Conceptual, Diagnostic, and Therapeutic Considerations in the Context of Co-Occurrence

Complex Dynamics in the Basal Ganglia: Health and Disease Beyond the Motor System

Poststroke Depressive Symptoms Are Associated With Increased Oxidative Deoxyribonucleic Acid Damage

Catatonia Under-Diagnosis in the General Hospital

Neuropsychiatric Factors Linked to Adherence and Short-Term Outcome in a U.S. Functional Neurological Disorders Clinic: A Retrospective Cohort Study

Official Journal of the American Neuropsychiatric Association  
[neuro.psychiatryonline.org](http://neuro.psychiatryonline.org)
