# The Journal of Neuropsychiatry and Clinical Neurosciences

Official Journal of the American Neuropsychiatric Association

## Editorial Board

The *Journal of Neuropsychiatry and Clinical Neurosciences* (ISSN 0895-0172), is published quarterly by the American Psychiatric Association (APA), 800 Maine Avenue SW, Suite 900, Washington, DC 20024. Copyright © 2018 American Psychiatric Association. The *Journal of Neuropsychiatry and Clinical Neurosciences* is protected by copyright and may not be reproduced in any manner without written permission. The *Journal* is abstracted/indexed in *Chemical Abstracts*, *Current Contents/Clinical Medicine*®, *EMBASE/Excerpta Medica*, *Index Medicus/MEDLINE/MEDLARS*, *PsycINFO*, *Psychological Abstracts*, *Research Alert*®, and *Sci Search*®. It is available through University Microfilms, Inc., 300 North Zeeb Road, Ann Arbor, MI 48106, in microform, electronic, or paper format.

Manuscript submissions should no longer be sent by mail. Please visit <http://mc.manuscriptcentral.com> to upload a paper online.

U.S. individual subscriptions are \$283 per year for 4 issues (\$226 for APA members); international subscriptions are \$426 per year (\$254 for online only). Institutional subscriptions are tier priced. For institutional site license information and pricing, please email us at [institutions@psych.org](mailto:institutions@psych.org), call (800) 368-5777 or visit [www.appi.org/institutions](http://www.appi.org/institutions).

Advertising inquiries may be directed to Tim Wolfinger at PMI, 30 East 33rd St., New York, NY 10016; (212) 904-0379; [twolfinger@pminy.com](mailto:twolfinger@pminy.com).

APA is not responsible for statements made in this publication by contributors or advertisers. Unless stated, material in the *Journal of Neuropsychiatry and Clinical Neurosciences* does not reflect the endorsement, official attitude, or position of APA or the American Neuropsychiatric Association.

Periodicals postage paid at Washington, DC, and additional mailing offices.  
POSTMASTER: Send address changes to *Journal of Neuropsychiatry and Clinical Neurosciences*, 800 Maine Avenue SW, Suite 900, Washington, DC 20024.

### Editor

David B. Arciniegas, M.D., FANPA

### Deputy Editor

C. Alan Anderson, M.D., FANPA

### Assistant to the Editors

T. Angelita Garcia, M.B.A.

### Consulting Editors

C. Edward Coffey, M.D., FANPA  
Thomas W. McAllister, M.D., FANPA  
Fred Ovsiew, M.D., FANPA  
David A. Silbersweig, M.D., FANPA  
Jonathan M. Silver, M.D., FANPA

### Associate Editors

Sheldon Benjamin, M.D., FANPA  
Deborah Black, M.D., Ph.D., FANPA  
Kevin J. Black, M.D., FANPA  
John J. Campbell, M.D., FANPA  
Miles Cunningham, M.D., FANPA  
Kirk Daffner, M.D.  
Christopher M. Filley, M.D.  
Richard B. Ferrell, M.D., FANPA  
Laura A. Flashman, Ph.D., FANPA  
Yonas E. Geda, M.D., FANPA  
Daniel I. Kaufer, M.D., FANPA  
W. Curt LaFrance, M.D., FANPA  
Edward C. Lauterbach, M.D., FANPA  
Mario Mendez, M.D., Ph.D., FANPA  
Charles Nemeroff, M.D., Ph.D.  
Robert G. Robinson, M.D., FANPA  
Jay Salpekar, M.D., FANPA  
Jeremy Schmahmann, M.D., FANPA  
Paula T. Trzepacz, M.D., FANPA  
Valerie Voon, M.D., Ph.D., FANPA  
Hal S. Wortzel, M.D., FANPA

### Editor Emeritus

Stuart C. Yudofsky, M.D.

### ANPA Abstract Editor

Kaloyan S. Tanev, M.D., FANPA

### Book Review Editor

Michael Schrift, D.O., M.A., FANPA

### Neuropsychiatry Classics Editor

Margo Lauterbach, M.D., FANPA

### Windows to the Brain Editors

Robin A. Hurley, M.D., FANPA  
Katherine H. Taber, Ph.D., FANPA

### American Psychiatric Association Publishing

John McDuffie

*Interim Publisher*

Michael Roy

*Editorial Director, Journals*

Demarie Jackson

*Managing Editor*

Angela Moore

*Editorial Manager*

Susan Westrate

*Production Manager, Journals*

Heidi Koch

*Editorial Support Services Manager*

Patrick Hansard

*Director of Marketing and Sales*

AMERICAN  
PSYCHIATRIC  
ASSOCIATION  
PUBLISHING

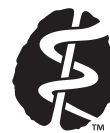

Please visit the Journal's website at [neuro.psychiatryonline.org](http://neuro.psychiatryonline.org)
